# Supplementary material
Source: HighWire-hosted journal article supplement (https://sti.bmj.com/content/93/6/431)
Supplement: inline-supplementary-material-1 [file inline-supplementary-material-1.pdf]

Table 5. Univariable and multivariable analysis of determinants for anorectal chlamydia and/or LGV (n=63) among 682 MSM at risk for these infections attending the STI outpatient clinic of Amsterdam, February - April 2011.

|                                                             | Total (N=682)<br>n (% within<br>group) | Univariable<br>OR [95% CI] | P<br>value | Multivariable <sup>c</sup><br>aOR [95%CI] | P value |
|-------------------------------------------------------------|----------------------------------------|----------------------------|------------|-------------------------------------------|---------|
| <b>Age (years)</b>                                          |                                        |                            | 0.204      |                                           | 0.081   |
| <35                                                         | 31/264 (11.7)                          | 1.6 [0.9-3.0]              |            | 2.0 [1.0-4.0]                             |         |
| 35-44                                                       | 16/209 (7.7)                           | 1.0 [0.5-2.0]              |            | 1.1 [0.5-2.2]                             |         |
| ≥45                                                         | 16/209 (7.7)                           | 1                          |            | 1                                         |         |
| <b>Ethnicity</b>                                            |                                        |                            | 0.008      |                                           | 0.013   |
| Dutch                                                       | 35/479 (7.3)                           | 1                          |            | 1                                         |         |
| Non-Dutch                                                   | 28/203 (13.8)                          | 2.0 [1.2-3.4]              |            | 2.0 [1.1-3.6]                             |         |
| <b>Number of sex partners<sup>d</sup></b>                   |                                        |                            | 0.110      |                                           | 0.134   |
| Log number of sex partners <sup>a</sup>                     |                                        | 1.2 [1.0-1.5]              |            | 1.2 [0.9-1.5]                             |         |
| <b>HIV status<sup>b</sup></b>                               |                                        |                            | 0.003      |                                           | 0.010   |
| HIV-negative                                                | 28/427 (6.6)                           | 1                          |            | 1                                         |         |
| HIV-positive                                                | 34/253 (13.4)                          | 2.2 [1.3-3.8]              |            | 2.2 [1.2-4.0]                             |         |
| <b>Most high-risk type of partner</b>                       |                                        |                            | 0.827      |                                           |         |
| Steady partner                                              | 6/78 (7.7)                             | 1                          |            |                                           |         |
| Known casual/<br>ex-steady partner                          | 16/198 (8.1)                           | 1.1 [0.4-2.8]              |            |                                           |         |
| Casual partner                                              | 28/277 (10.1)                          | 1.4 [0.5-3.4]              |            |                                           |         |
| Anonymous partner/<br>Sex worker/client                     | 13/129 (10.1)                          | 1.4 [0.5-3.7]              |            |                                           |         |
| <b>Condomless Anal Sex (CAS)<sup>d</sup></b>                |                                        |                            | 0.041      |                                           | 0.111   |
| No CAS (always condom)                                      | 18/278 (6.5)                           | 1                          |            | 1                                         |         |
| CAS (no or inconsistent<br>condom use or condom<br>failure) | 45/404 (11.1)                          | 1.8 [1.0-3.2]              |            | 1.6 [0.9-3.0]                             |         |
| <b>Rectal douching</b>                                      |                                        |                            | 0.186      |                                           | 0.565   |
| No rectal douching                                          | 17/240 (7.1)                           | 1                          |            | 1                                         |         |
| Rectal douching but not<br>sharing equipment                | 31/328 (9.5)                           | 1.4 [0.7-2.5]              |            | 1.1 [0.6-2.2]                             |         |
| Rectal douching and sharing<br>douching equipment           | 15/114 (13.2)                          | 2.0 [0.95-4.1]             |            | 1.5 [0.7-3.5]                             |         |

<sup>a</sup> Per 1 log increase<sup>b</sup> Missing number of HIV status n=2<sup>c</sup> In multivariable model 680 persons were included of whom 62 had anorectal chlamydia and/or LGV.<sup>d</sup> Forced in the multivariate model(Marcus)

Table 6. Univariable and multivariable analysis of determinants for anorectal gonorrhoea (n=42) among 682 MSM at risk for these infections attending the STI outpatient clinic of Amsterdam, February - April 2011.

|                                                             | Total (N=682)<br>n (% within group) | Univariable<br>OR [95% CI] | P value | Multivariable <sup>c</sup><br>aOR [95%CI] | P value |
|-------------------------------------------------------------|-------------------------------------|----------------------------|---------|-------------------------------------------|---------|
| <b>Age (years)</b>                                          |                                     |                            | 0.139   |                                           | 0.051   |
| <35                                                         | 19/264 (7.2)                        | 2.2 [1.0-5.4]              |         | 3.0 [1.2-7.6]                             |         |
| 35-44                                                       | 16/209 (7.7)                        | 2.4 [1.0-5.9]              |         | 2.8 [0.3-2.8]                             |         |
| ≥45                                                         | 7/209 (3.3)                         | 1                          |         | 1                                         |         |
| <b>Ethnicity</b>                                            |                                     |                            | 0.385   |                                           |         |
| Dutch                                                       | 27/479 (5.6)                        | 1                          |         |                                           |         |
| Non-Dutch                                                   | 15/203 (7.4)                        | 1.3 [0.7-2.6]              |         |                                           |         |
| <b>Number of sex partners</b>                               |                                     |                            | 0.085   |                                           | 0.069   |
| Log number of sex partners <sup>a</sup>                     |                                     | 1.3 [1.0-1.7]              |         | 1.3 [1.0-1.7]                             |         |
| <b>HIV status<sup>b</sup></b>                               |                                     |                            | 0.059   |                                           | 0.119   |
| HIV-negative                                                | 20/427 (4.7)                        | 1                          |         | 1                                         |         |
| HIV-positive                                                | 21/253 (8.3)                        | 1.8 [1.0-3.5]              |         | 1.8 [0.9-3.6]                             |         |
| <b>Most high-risk type of partner</b>                       |                                     |                            | 0.905   |                                           |         |
| Steady partner                                              | 6/78 (7.7)                          | 1                          |         |                                           |         |
| Known casual/<br>ex-steady partner                          | 13/198 (6.6)                        | 0.8 [0.3-2.3]              |         |                                           |         |
| Casual partner                                              | 16/277 (5.8)                        | 0.7 [0.3-1.9]              |         |                                           |         |
| Anonymous partner/<br>Sex worker/client                     | 7/129 (5.4)                         | 0.7 [0.2-2.1]              |         |                                           |         |
| <b>Condomless Anal Sex (CAS)</b>                            |                                     |                            | 0.051   |                                           | 0.080   |
| No CAS (always condom)                                      | 11/278 (4.0)                        | 1                          |         | 1                                         |         |
| CAS (no or inconsistent<br>condom use or condom<br>failure) | 31/404 (7.7)                        | 2.0 [1.0-4.1]              |         | 1.9 [0.9-4.0]                             |         |
| <b>Rectal douching</b>                                      |                                     |                            | 0.414   |                                           | 0.775   |
| No rectal douching                                          | 11/240 (4.6)                        | 1                          |         | 1                                         |         |
| Rectal douching but not<br>sharing equipment                | 24/328 (7.3)                        | 1.6 [0.8-3.4]              |         | 1.2 [0.6-2.8]                             |         |
| Rectal douching and sharing<br>douching equipment           | 7/107 (6.1)                         | 1.4 [0.5-3.6]              |         | 1.0 [0.3-2.8]                             |         |

<sup>a</sup> Per 1 log increase

<sup>b</sup> Missing number of HIV status n=2

<sup>c</sup> In multivariable model 680 persons were included of whom 41 had anorectal gonorrhoea.
